# Supplementary material for: Aberrant methylation patterns in colorectal cancer: a meta-analysis
Source: PubMed Central journal article supplement (PMC5355058; doi:10.18632/oncotarget.14590), 2017-01-10
Supplement: oncotarget-08-12820-s001.pdf [file oncotarget-08-12820-s001.pdf]

## Aberrant methylation patterns in colorectal cancer: a meta-analysis

### Supplementary Materials

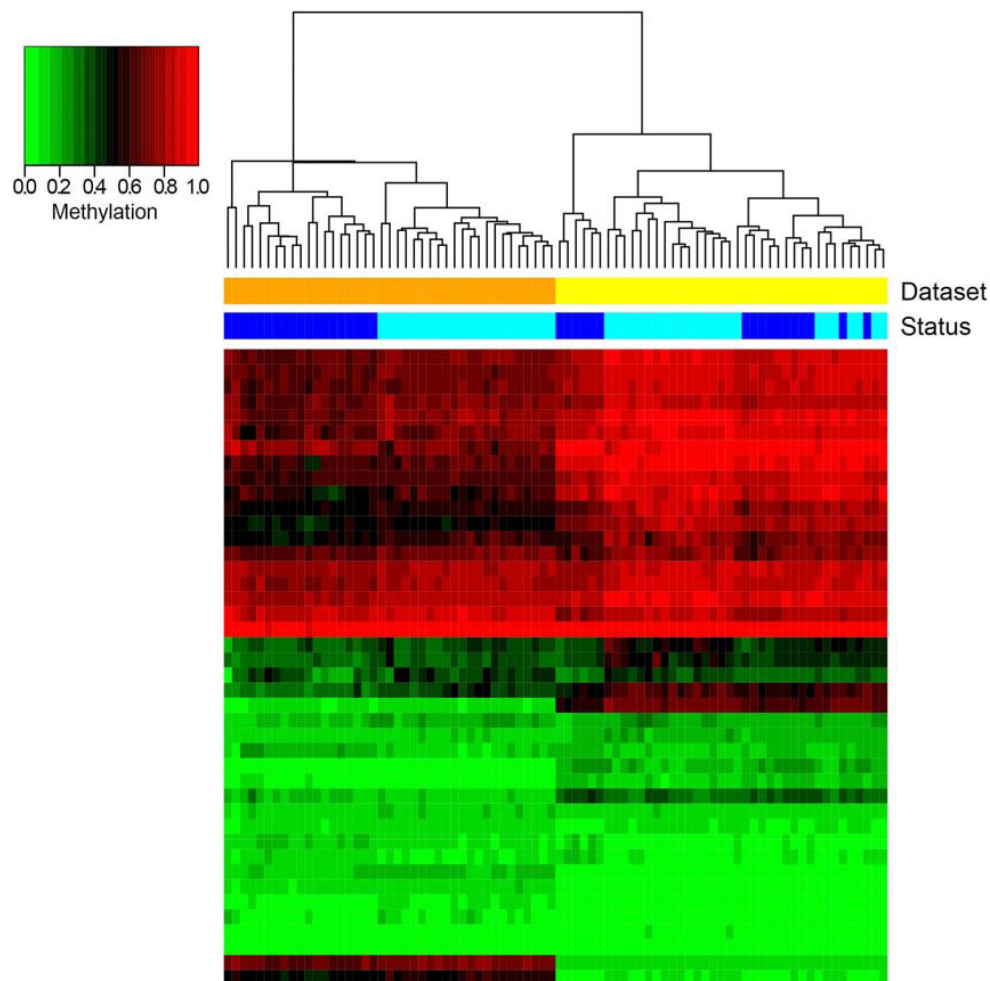

**Supplementary Figure 1: Hierarchical clustering of DMRs resulting from the comparison N1xN2 and heatmap representation of their methylation values.** Columns correspond to samples, rows correspond to DMRs (for graphical purposes only the top significantly differential CpG of each BOP is reported). Color bars indicate the status of the samples (blue: N1; cyan: N2) and the dataset of origin (orange: Naumov; yellow: Luo).

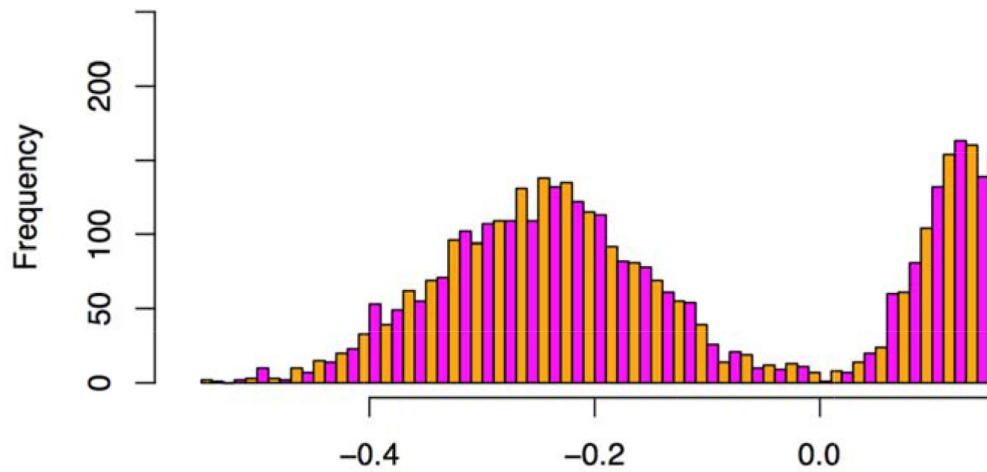

**Supplementary Figure 2: Histogram of N1xADE analysis—Frequency of delta methylation values to Luo and Timp N1xADE analysis considering all significant DM BOPs using a  $q$ -value of 0.001.**

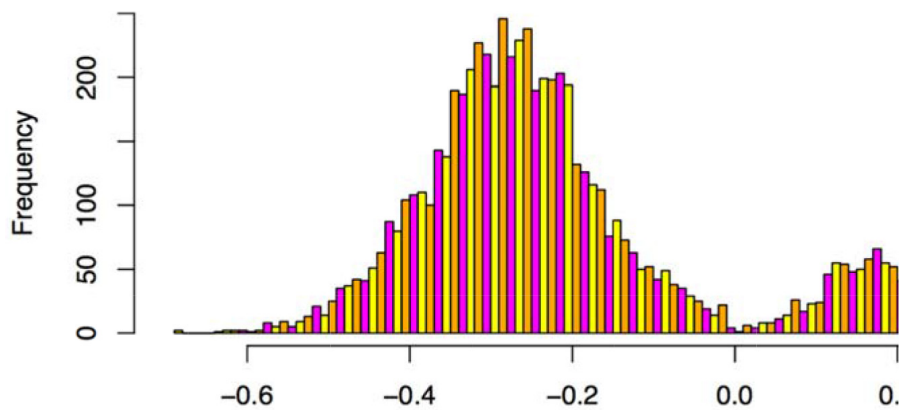

**Supplementary Figure 3: Histogram of N1xCRC analysis—Frequency of delta methylation values to Naumov, Luo and Timp N1xCRC analysis considering all significant DM BOPs using a  $q$ -value of 0.001.**

**Supplementary File 1: Differentially methylated BOPs for each colorectal cancer phase studied.**

See Supplementary\_File\_2

**Supplementary File 2: Network genes and DM genes exclusive to each colorectal cancer phase studied.** See Supplementary\_File\_2

**Supplementary File 3: Network nodes, topological parameters and functional informations.**

See Supplementary\_File\_3

**Supplementary File 4: Network hubs to each colorectal cancer phase studied.**

See Supplementary\_File\_4

**Supplementary File 5: Kegg pathways analysis of the network genes (nodes).**

See Supplementary\_File\_5

**Supplementary File 6: Comparison of methylation profiles of genes DM hubs of N1xADE and N1xCRC.** See Supplementary\_File\_6

**Supplementary File 7: The Cancer Genome Atlas COADREAD samples characteristics.**

See Supplementary\_File\_7

**Supplementary File 8: Scatter plots Age versus CpGs methylation levels; plus linear regression from TCGA dataset.** See Supplementary\_File\_8

**Supplementary File 9: Boxplots showing methylation levels by BRAF and KRAS gene mutation status—abnormal and normal.** See Supplementary\_File\_9
